# Supplementary material for: eDEM-CONNECT: Agitation ontology for the chatbot-based support of informal caregivers of people with dementia
Source: Research Square preprint supplement (doi:10.21203/rs.3.rs-6289849/v1), 2025-04-22
Supplement: Supplementary file 1 [file 1200e3ef6dd53f7c70f44aa3.docx]

**eDEM-CONNECT: Agitation ontology for the chatbot-based support of informal caregivers of people with dementia**

Sumaiya Suravee1, Christiane Pinkert2, Iris Hochgraeber3, Margareta Halek2, Bernhard Holle4, Kristina Yordanova1

1. Institute of Data Science, Universität Greifswald, 17489 Greifswald, Germany

{sumaiya.suravee, kristina.yordanova}@uni-greifswald.de

1. School of Nursing Science, Faculty of Health, Universität Witten/Herdecke, 58453 Witten, Germany

{margareta.halek, christiane.pinkert}@uni-wh.de

1. Seniorenhaus GmbH der Cellitinnen zur heiligen Maria, 50931 Cologne, Germany {iris.hochgraeber}@cellitinnen.de
2. German Centre for Neurodegenerative Diseases (DZNE), 58453 Witten, Germany {bernhard.holle}@dzne.de

**The EDEM-CONNECTONTO**

The EDEM-CONNECTONTO has 241 concepts, 8 relations, and 240 individuals. The 5 most hierarchical concepts in the EDEM-CONNECTONTO are **“Person”, “Agitation”, “Causes”, “Consequences” and “Interventions”**. First, we determined the requirements that the EDEM-CONNECTONTO needs to satisfy. The result of this activity was the set of ontology requirements, which is about the objective, the scope, the target audience, the implementing tool, and the probable use cases of the EDEM-CONNECTONTO (see Supplementary Table 1). Based on the specifications, the EDEM-CONNECTONTO was designed through domain analysis, state-of-the-art review, brainstorming with domain experts, and interviews with family carers (see interview question in the Supplementary Table 2).

Supplementary Table 1: Ontology requirements specification for the EDEM-CONNECTONTO.

| Required specifications |
| --- |
| Objective: To provide a structured knowledge base in the domain of PwD.  Scope: Address the challenging behaviors of PwD and the dyadic relationship to ensure the stability of care-based arrangements at home.  Implementation: The EDEM-CONNECTONTO will be developed in the Web Ontology Language (OWL) using Protégé 5.5.0.  Target users:   - Direct user: Chatbot users (e.g., informal caregivers of the PwD) - End user: Researchers in the biomedical/medicine/health domain will develop an understanding to refine the quality of care; software engineers will create a data model to help healthcare professionals/clinicians manage agitation in dementia.   Target use cases:   - Direct use case : To develop a annotation codebook for annotaing a demetia related textual dataset that contains challenging behavior of PwD related to agitation. - End use case: To make online contents about the various forms of agitation in the PwD, causes that triggers to exhibits agitated behavior and the non-pharmacological interventions for addressing them. |

Supplementary Table 2: Interview questions asked to the family caregivers.

|  | Interview guide |
| --- | --- |
| Q1 | How did it come about that the family caregiver took care of the PwD? |
| Q2 | When the family caregiver thinks of the PwD, what activities does he/she still do today that he/she used to enjoy doing? |
| Q3 | What does a good day with the PwD look like? |
| Q4 | Were there any situations in when the family caregivers were particularly dependent on additional help? |
| Q5 | How was the relationship between the PwD and the family caregivers before dementia? |
| Q6 | Has the relationship between the PwD and the family caregiver changed? What has changed ? |
| Q7 | What does the PwD think about her/his relationship with the family caregiver ? |
| Q8 | Do the family caregivers think their relationship influences how they deal with difficult situations? And how exactly ? |
| Q9 | Are there conflicts between the PwD and the family caregivers? |
| Q10 | Has the PwD experienced certain changes in behavior, such as agitated or aggressive behavior? |
| Q11 | How often does this behaviour occur with the PwD ? |
| Q12 | Are there specific situations or special events in which/before the behavior occurs? |
| Q13 | How long does the agitated behavior last of the PwD? |
| Q14 | What does a restless day with the PwD look like? |
| Q15 | What do the family caregiver think about this behaviour ? |
| Q16 | What impact does agitated behavior have on the family caregiver and their relationship? |
| Q17 | Are there any situations in this context that are or were particularly stressful for the family caregiver? |
| Q18 | How the family caregiver typically handles in this situation? |
| Q19 | Which support services help the family caregiver ? |
| Q20 | What future challenges await for the family caregiver ? |
| Q21 | How well do the family caregiver feel prepared for them? |
| Q22 | What support would the family caregiver like to be able to deal with the PwD’s behavior? |
| Q23 | If the caregiver had three wishes as a family carer, what would they be? |

**Reference:**

**[1]** eDEM-Connect: Ontology of Dementia-related Agitation and Relationship between Informal Caregivers and Persons with Dementia - Person - Classes | NCBO BioPortal [Internet]. Bioontology.org. 2024 [cited 2024 Jul 11]. Available from: <https://bioportal.bioontology.org/ontologies/EDEM-CONNECTONTO/?p=classes&conceptid=http%3A%2F%2Fwww.semanticweb.org%2Fsumaiyasuravee%2Fontologies%2F2023%2F5%2Funtitled-ontology-20%23Person>.
